# Supplementary material
Source: PubMed Central journal article supplement (PMC3638177)
Supplement: supp_amiajnl-2012-000892_amiajnl-2012-000892-s1.pdf [file supp_amiajnl-2012-000892_amiajnl-2012-000892-s1.pdf]

## **Web-Only Appendix. Literature search strategy**

### *MEDLINE Search Strategy*

1. exp Decision Making, Computer-Assisted/
2. exp Reminder Systems/
3. exp Feedback/
4. exp Guideline/
5. exp Computers/
6. exp Decision Support Systems, Clinical/ or Expert Systems/
7. Decision Making/
8. exp Physician's Practice Patterns/
9. 1 or 2 or 3 or 4 or 5 or 6 or 7 or 8
10. exp Genetics/ or exp Genetic Variation/
11. exp Genomics/
12. 10 or 11
13. exp Pedigree/
14. 13
15. limit 14 to humans
16. Genetic Predisposition to Disease/
17. ((family or familial) adj3 (histor\$ or history-taking or risk\$)).ti.
18. (human adj2 pedigree).ti,ab.
19. Family Health/
20. (family history adj3 (taking or collect\$ or tool? or questionnaire? or form? or algorithm?m or assessment)).ti,ab.
21. (familial history adj3 (taking or collect\$ or tool? or questionnaire? or form? or algorithm?m or assessment)).ti,ab.
22. (genetic adj2 (risk adj3 (assessment or evaluation))).ti,ab.
23. ((first or second) adj2 degree relative?).ti,ab.
24. ((parental or paternal or maternal) adj2 history).ti.
25. or/15-24
26. Risk factors.ti.
27. \*risk factors/
28. or/26-27
29. family history.tw.
30. 28 and 29
31. 25 or 30
32. 12 or 31
33. 9 and 32
34. 33
35. limit 34 to english language
36. 35
37. limit 36 to yr="1990 -2011"
38. exp Individualized Medicine/
39. personalized health\*.mp. [mp=title, abstract, original title, name of substance word, subject heading word, protocol supplementary concept, rare disease supplementary concept, unique identifier]
40. personalized medicine.mp. [mp=title, abstract, original title, name of substance word, subject heading word, protocol supplementary concept, rare disease supplementary concept, unique identifier]
41. 38 or 39 or 40
42. 9 and (12 or 31 or 41)
43. limit 42 to (english language and yr="1990 -2011")

*Embase Search Strategy*

1. `Clinical decision support' AND [1990-2011]/py
2. `expert system'/exp OR `expert system' AND [1990-2011]/py
3. #1 OR #2
4. `genetics'/exp OR `expert system' AND [1990-2011]/py
5. `genomics'/exp OR genomics AND [1990-2011]/py
6. `family history'/exp OR `family history' AND [1990-2011]/py
7. `personalized medicine'/exp OR `personalized medicine' AND [1990-2011]/py
8. #4 OR #5 OR #6 OR #7
9. #3 AND #8
